# Supplementary material for: Using respiration quotients to track changing sources of soil respiration seasonally and with experimental warming
Source: Copernicus journal article supplement (doi:10.5194/bg-17-3045-2020), 2020-06-17
Supplement: Supplementary file 2 [file bg-17-3045-2020-supplement.zip]

Archive with 8 entries (5 files):
- Supplement/
- Supplement/Supplemental Figure.pdf
- Supplement/ARQ_R_code.R
- bg-17-3045-2020-supplement-title-page.pdf
- __MACOSX/
- __MACOSX/Supplement/
- __MACOSX/Supplement/._ARQ_R_code.R
- __MACOSX/Supplement/._Supplemental Figure.pdf
