# Supplementary material for: Using respiration quotients to track changing sources of soil respiration seasonally and with experimental warming
Source: Copernicus journal article supplement (doi:10.5194/bg-17-3045-2020), 2020-06-17
Supplement: Supplementary file 2 [file bg-17-3045-2020-supplement.zip › bg-17-3045-2020-supplement-title-page.pdf]

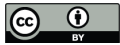

## *Supplement of*

# **Using respiration quotients to track changing sources of soil respiration seasonally and with experimental warming**

**Caitlin Hicks Pries et al.**

*Correspondence to:* Caitlin Hicks Pries ([caitlin.pries@dartmouth.edu](mailto:caitlin.pries@dartmouth.edu))

- [bg-17-3045-2020-supplement-title-page.pdf](#)
- Supplement
  - [ARQ\\_R\\_code.R](#)
  - [Supplemental Figure.pdf](#)
- [\\_\\_MACOSX](#)
  - Supplement
    - \* [.\\_ARQ\\_R\\_code.R](#)
    - \* [.\\_Supplemental Figure.pdf](#)

The copyright of individual parts of the supplement might differ from the CC BY 4.0 License.
