# Supplementary material for: Using respiration quotients to track changing sources of soil respiration seasonally and with experimental warming
Source: Copernicus journal article supplement (doi:10.5194/bg-17-3045-2020), 2020-06-17
Supplement: Supplementary file 2 [file bg-17-3045-2020-supplement.zip › Supplement/Supplemental Figure.pdf]

## Supplemental Figure

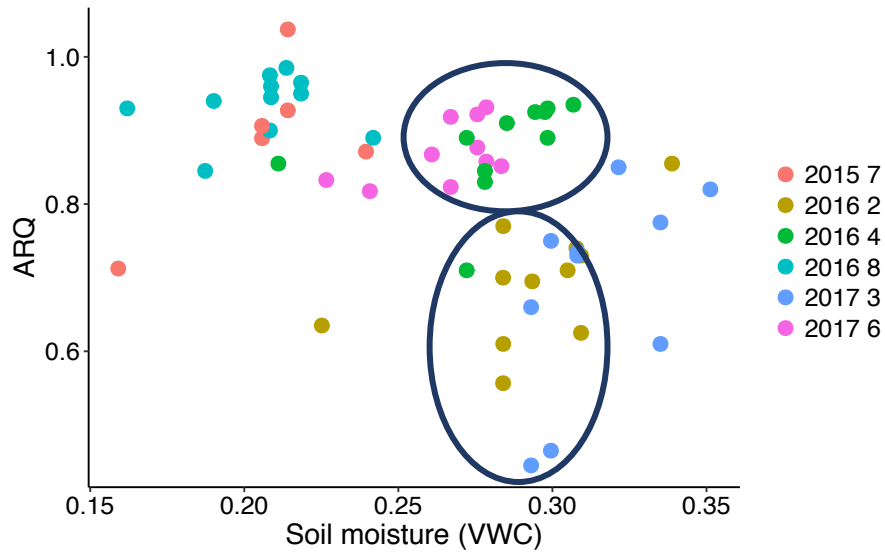

**Figure S1.** The variability in the apparent respiration quotient's (ARQ) relationship with soil moisture at 0.25 to 0.30 VWC can be explained by time of year. The greater ARQ values (in the top circle) are from April and June while the lower values (in the bottom circle) are from February and March. Colors are by sampling date shown as year and month.
